# Supplementary material for: Combined NMR and molecular dynamics modeling study of transport properties in sulfonamide based deep eutectic lithium electrolytes: LiTFSI based binary systems
Source: Royal Society of Chemistry journal article supplement (doi:10.1039/c5cp05811b), 2016-01-01
Supplement: c5cp05811b1.pdf [file c5cp05811b1.pdf]

**Combined NMR and Molecular Dynamics Modeling  
Study of Transport Properties in Sulfonamide Based  
Deep Eutectic Lithium Electrolytes. 1. LiTFSI Based  
Binary Systems**

**Electronic Supplementary Information:**

Allen D. Pauric<sup>1</sup>, Ion C. Halalay<sup>2</sup>, and Gillian R. Goward<sup>1\*</sup>

<sup>1</sup>Department of Chemistry, McMaster University, Hamilton, Canada.

<sup>2</sup>General Motors R&D Center, Warren, MI, USA.

\*Corresponding author; e-mail: [goward@mcmaster.ca](mailto:goward@mcmaster.ca)

Figures S-1 through S-4 display the volume integrals  $G(R)$ , for the lithium- nitrogen (Figs. S-1 and S-2) and lithium-oxygen interactions. They help to further detail the discussion of the coordination environments surrounding the lithium cations.

From Figs. S-1a and S-2a one can draw a contrast between the monodentate and bidentate coordinations on one hand, and the direct nitrogen coordination on the other. A comparison is made for the coordination number from the second plateau (monodentate/bidentate) versus the first (direct nitrogen coordination). This proportion is roughly 10:1 for nitrogen atoms being in an indirect versus a direct bonding environment. Furthermore, it appears that direct nitrogen coordination via MSA is found for one in every 10-20 lithium cations. This confirms that oxygen coordination is the predominant mode of interaction. The volume integrals for the lithium-oxygen coordination are shown in Figures S-3 and S-4 and have a number of similarities. However, a key difference is in the coordination number of lithium with respect to DMMSA versus MSA. At a 1:1 solvent:salt ratio there exists coordination of approximately 1.5 oxygen atoms from the organic components in both cases. However, at 6:1 solvent:salt ratio the oxygen coordination number for DMMSA is  $\sim 4.1$ , whereas for MSA it approaches 5 oxygen atoms. This can be explained by the smaller size of MSA and the increased mixture density when compared to the DMMSA based mixtures.

Figure 5 uses previously reported conductivity measurements [28] in combination with the diffusion coefficients by NMR, to address the issue of ionicity. The ratio between the conductivity measured by impedance spectroscopy versus that measured via NMR using the Nernst-Einstein relation is in line with the expectations outlined in the paper. Specifically, while significant ion pairing can be observed, its magnitude mirrors the trends observed in transport number. The 3:1 MSA:LiTFSI composition has the greatest degree of ionicity with a lithium transport number ranging from 0.625 to 0.6 over the temperature range of the measurements. This is in contrast to the 6:1

DMMSA:LiTFSI mixture, where the ionicity is lowest and the transport number ranges from 0.40 to 0.35 over the investigated temperature range. These results provide further confirmation that the introduction a hydrogen bonding component can mitigate ion pairing, albeit at the expense of overall conductivity.

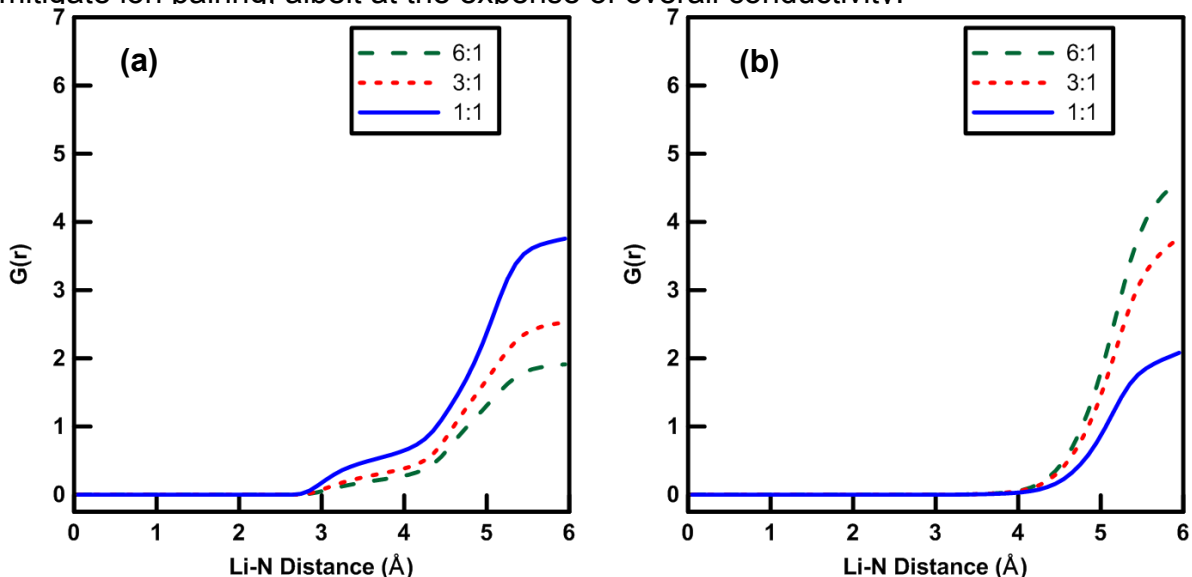

**Figure S-1:** Lithium-nitrogen volume integrals for Li $^+$  contact with TFSI $^-$  (a) and DMMSA (b) in DMMSA:LiTFSI mixtures at 298 K.

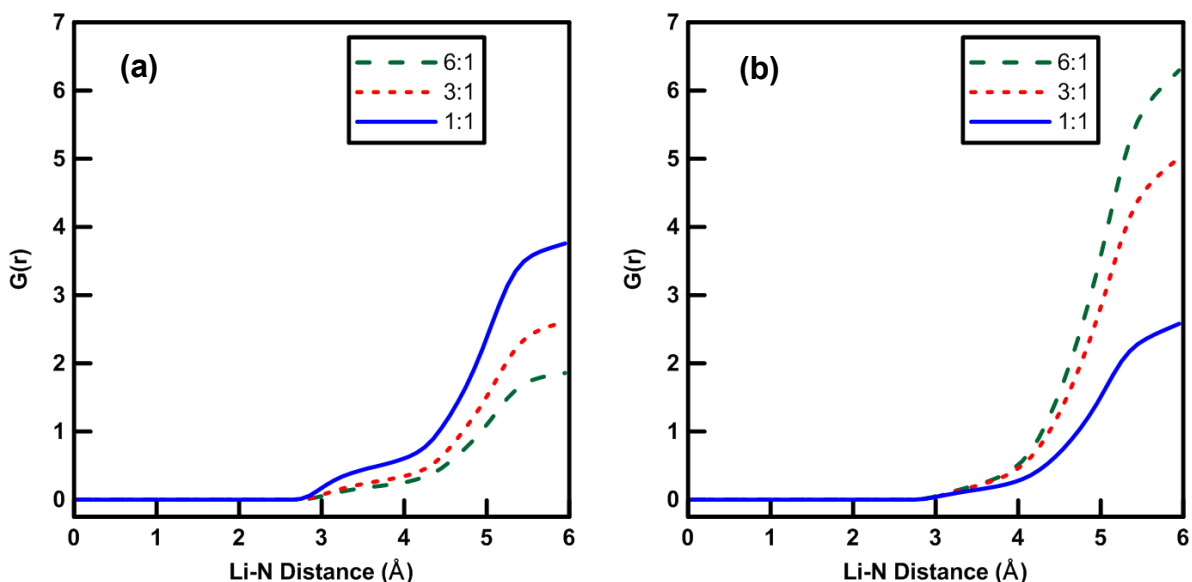

**Figure S-2:** Lithium-nitrogen volume integrals for Li $^+$  contact with TFSI $^-$  (a) and MSA (b) in MSA:LiTFSI mixtures at 298K.

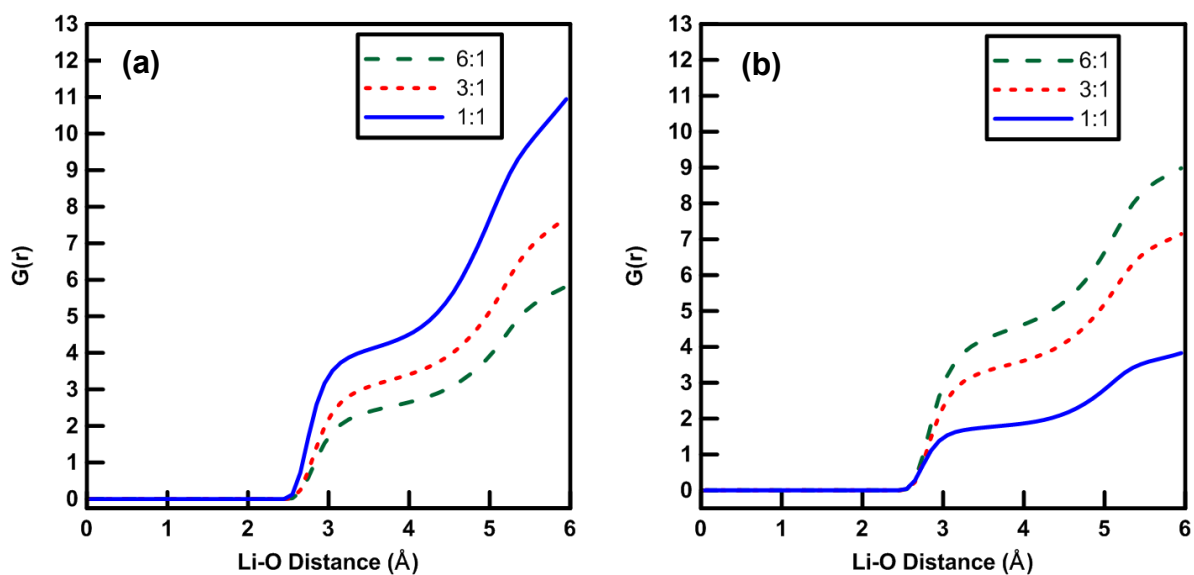

**Figure S-3:** Lithium – oxygen volume integrals for intermolecular contact between  $\text{Li}^+$  and  $\text{TFSI}^-$  (a) or DMMSA (b) for DMMSA:LiTFSI mixtures at 298 K.

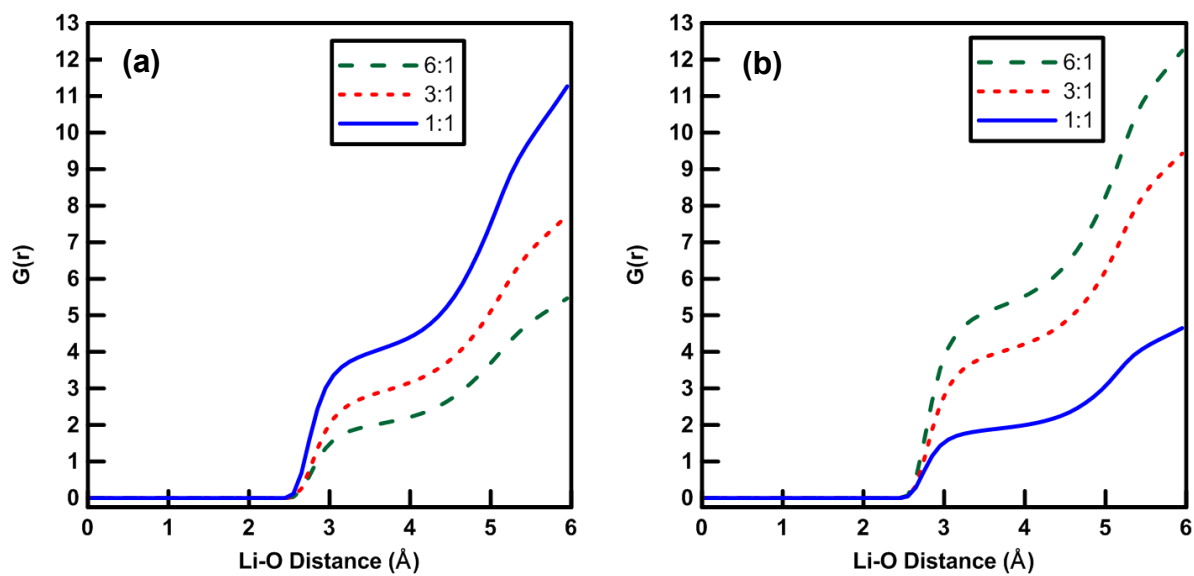

**Figure S-4:** Lithium – oxygen volume integrals for intermolecular contact between  $\text{Li}^+$  and  $\text{TFSI}^-$  (a) or MSA (b) for MSA:LiTFSI mixtures at 298 K.

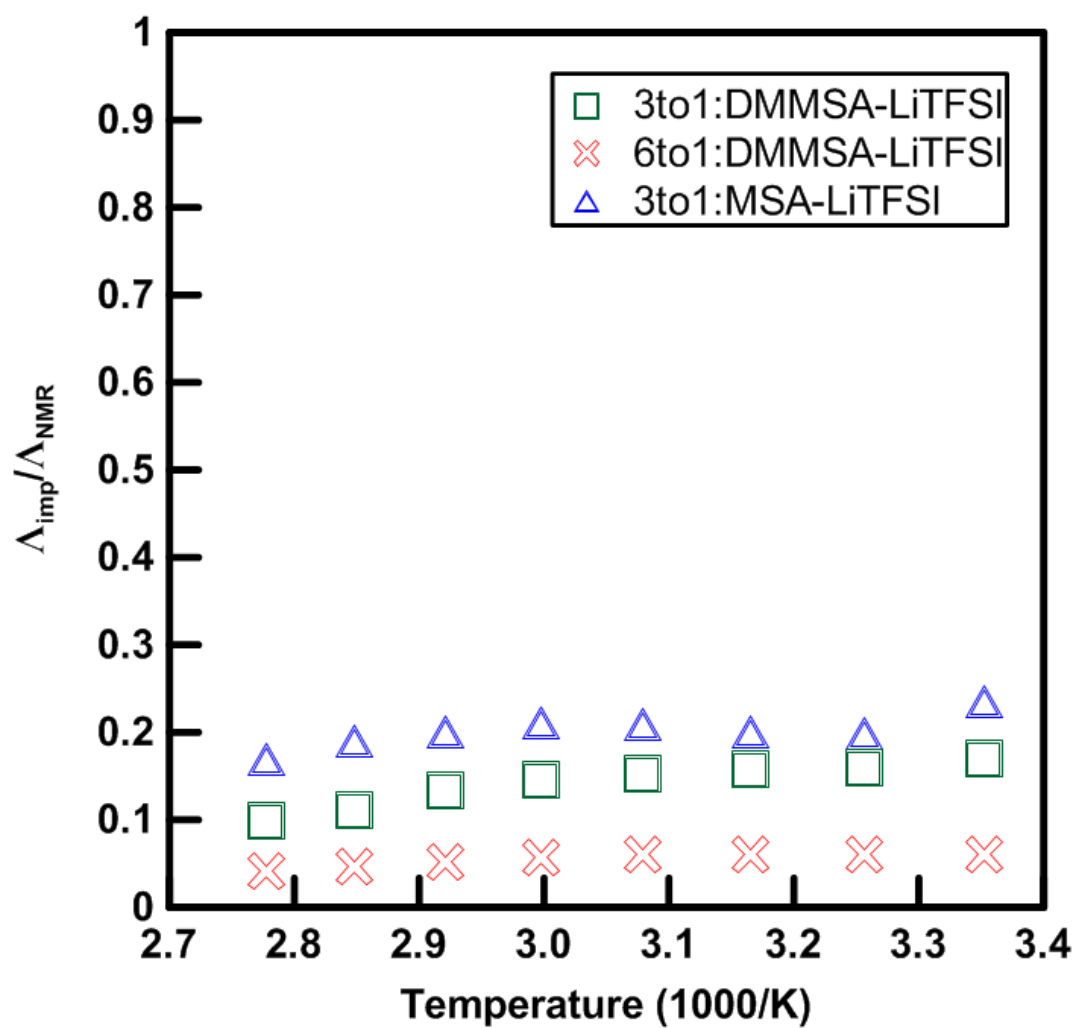

**Figure S-5:** Ionicity derived through the ratio of molar conductivities, as determined by impedance spectroscopy and NMR.
